# Supplementary material for: Clinical Characteristics and Outcomes of Non-small Cell Lung Cancer Patients with HER2 Alterations in Korea
Source: PubMed Central journal article supplement — Cancer Res Treat. 2019 Jul 26;52(1):292–300. doi: 10.4143/crt.2019.186 (PMC6962476; doi:10.4143/crt.2019.186), 2019-07-26
Supplement: crt-2019-186-suppl.pdf [file crt-2019-186-suppl.pdf]

**S1 Table.** Target genes of CancerSCAN version 2

|    | Genes    | SNV/Indel/CNV | Fusion | Promoter |
|----|----------|---------------|--------|----------|
| 1  | ABL1     | O             | O      | X        |
| 2  | ABL2     | O             | X      | X        |
| 3  | ACVR1B   | O             | X      | X        |
| 4  | AKT1     | O             | X      | X        |
| 5  | AKT2     | O             | X      | X        |
| 6  | AKT3     | O             | X      | X        |
| 7  | ALK      | O             | O      | X        |
| 8  | ALOX12B  | O             | X      | X        |
| 9  | APC      | O             | X      | X        |
| 10 | APCDD1   | O             | X      | X        |
| 11 | APOBEC3A | O             | X      | X        |
| 12 | APOBEC3B | O             | X      | X        |
| 13 | AR       | O             | X      | X        |
| 14 | ARAF     | O             | X      | X        |
| 15 | ARFRP1   | O             | X      | X        |
| 16 | ARID1A   | O             | X      | X        |
| 17 | ARID1B   | O             | X      | X        |
| 18 | ARID2    | O             | X      | X        |
| 19 | ASXL1    | O             | X      | X        |
| 20 | ATM      | O             | X      | X        |
| 21 | ATR      | O             | X      | X        |
| 22 | ATRX     | O             | X      | X        |
| 23 | AURKA    | O             | X      | X        |
| 24 | AURKB    | O             | X      | X        |
| 25 | AXIN1    | O             | X      | X        |
| 26 | AXL      | O             | X      | X        |
| 27 | B2M      | O             | X      | X        |
| 28 | BACH1    | O             | X      | X        |
| 29 | BAP1     | O             | X      | X        |
| 30 | BARD1    | O             | X      | X        |
| 31 | BCL2     | O             | O      | X        |
| 32 | BCL2A1   | O             | X      | X        |
| 33 | BCL2L1   | O             | X      | X        |
| 34 | BCL2L2   | O             | X      | X        |
| 35 | BCL6     | O             | X      | X        |
| 36 | BCOR     | O             | X      | X        |
| 37 | BCORL1   | O             | X      | X        |
| 38 | BCR      | O             | O      | X        |
| 39 | BLM      | O             | X      | X        |
| 40 | BRAF     | O             | O      | X        |
| 41 | BRCA1    | O             | X      | X        |
| 42 | BRCA2    | O             | X      | X        |
| 43 | BRD2     | O             | X      | X        |
| 44 | BRD3     | O             | X      | X        |
| 45 | BRD4     | O             | X      | X        |
| 46 | BRIP1    | O             | X      | X        |

|    |          |   |   |   |
|----|----------|---|---|---|
| 47 | BTG1     | 0 | X | X |
| 48 | BTK      | 0 | X | X |
| 49 | C11ORF30 | 0 | X | X |
| 50 | C15ORF55 | 0 | X | X |
| 51 | CARD11   | 0 | X | X |
| 52 | CASP8    | 0 | X | X |
| 53 | CBFB     | 0 | X | X |
| 54 | CBL      | 0 | X | X |
| 55 | CCND1    | 0 | X | X |
| 56 | CCND2    | 0 | X | X |
| 57 | CCND3    | 0 | X | X |
| 58 | CCNE1    | 0 | X | X |
| 59 | CD79A    | 0 | X | X |
| 60 | CD79B    | 0 | X | X |
| 61 | CDC42    | 0 | X | X |
| 62 | CDC73    | 0 | X | X |
| 63 | CDH1     | 0 | X | X |
| 64 | CDH2     | 0 | X | X |
| 65 | CDH20    | 0 | X | X |
| 66 | CDH5     | 0 | X | X |
| 67 | CDK12    | 0 | X | X |
| 68 | CDK4     | 0 | X | X |
| 69 | CDK6     | 0 | X | X |
| 70 | CDK8     | 0 | X | X |
| 71 | CDKN1B   | 0 | X | X |
| 72 | CDKN2A   | 0 | X | X |
| 73 | CDKN2B   | 0 | X | X |
| 74 | CDKN2C   | 0 | X | X |
| 75 | CDX2     | 0 | X | X |
| 76 | CEBPA    | 0 | X | X |
| 77 | CHD1     | 0 | X | X |
| 78 | CHD2     | 0 | X | X |
| 79 | CHD4     | 0 | X | X |
| 80 | CHEK1    | 0 | X | X |
| 81 | CHEK2    | 0 | X | X |
| 82 | CHUK     | 0 | X | X |
| 83 | CIC      | 0 | X | X |
| 84 | CRBN     | 0 | X | X |
| 85 | CREBBP   | 0 | X | X |
| 86 | CRKL     | 0 | X | X |
| 87 | CRLF2    | 0 | X | X |
| 88 | CSF1R    | 0 | X | X |
| 89 | CTCF     | 0 | X | X |
| 90 | CTNNA1   | 0 | X | X |
| 91 | CTNNB1   | 0 | X | X |
| 92 | CUL4A    | 0 | X | X |
| 93 | CUL4B    | 0 | X | X |
| 94 | CYLD     | 0 | X | X |
| 95 | CYP17A1  | 0 | X | X |

|     |         |   |   |   |
|-----|---------|---|---|---|
| 96  | DAXX    | O | X | X |
| 97  | DDR2    | O | X | X |
| 98  | DIS3    | O | X | X |
| 99  | DNMT1   | O | X | X |
| 100 | DNMT3A  | O | X | X |
| 101 | DOCK2   | O | X | X |
| 102 | DOT1L   | O | X | X |
| 103 | EGFR    | O | O | X |
| 104 | ELMO1   | O | X | X |
| 105 | EP300   | O | X | X |
| 106 | EPHA3   | O | X | X |
| 107 | EPHA5   | O | X | X |
| 108 | EPHA6   | O | X | X |
| 109 | EPHA7   | O | X | X |
| 110 | EPHB1   | O | X | X |
| 111 | EPHB4   | O | X | X |
| 112 | EPHB6   | O | X | X |
| 113 | ERBB2   | O | X | X |
| 114 | ERBB3   | O | X | X |
| 115 | ERBB4   | O | X | X |
| 116 | ERCC2   | O | X | X |
| 117 | ERG     | O | X | X |
| 118 | ESR1    | O | X | X |
| 119 | ETV1    | O | O | X |
| 120 | ETV4    | O | O | X |
| 121 | ETV5    | O | O | X |
| 122 | ETV6    | O | O | X |
| 123 | EWSR1   | O | O | X |
| 124 | EYA2    | O | X | X |
| 125 | EZH2    | O | X | X |
| 126 | FAM123B | O | X | X |
| 127 | FAM46C  | O | X | X |
| 128 | FANCA   | O | X | X |
| 129 | FANCC   | O | X | X |
| 130 | FANCD2  | O | X | X |
| 131 | FANCE   | O | X | X |
| 132 | FANCF   | O | X | X |
| 133 | FANCG   | O | X | X |
| 134 | FANCI   | O | X | X |
| 135 | FANCL   | O | X | X |
| 136 | FANCM   | O | X | X |
| 137 | FAT3    | O | X | X |
| 138 | FBXW7   | O | X | X |
| 139 | FGF10   | O | X | X |
| 140 | FGF12   | O | X | X |
| 141 | FGF14   | O | X | X |
| 142 | FGF19   | O | X | X |
| 143 | FGF23   | O | X | X |
| 144 | FGF3    | O | X | X |

|     |          |   |   |   |
|-----|----------|---|---|---|
| 145 | FGF4     | O | X | X |
| 146 | FGF6     | O | X | X |
| 147 | FGF7     | O | X | X |
| 148 | FGFR1    | O | O | X |
| 149 | FGFR2    | O | X | X |
| 150 | FGFR3    | O | O | X |
| 151 | FGFR4    | O | X | X |
| 152 | FLT1     | O | X | X |
| 153 | FLT3     | O | X | X |
| 154 | FLT4     | O | X | X |
| 155 | FOXA1    | O | X | X |
| 156 | FOXL2    | O | X | X |
| 157 | FUBP1    | O | X | X |
| 158 | GATA1    | O | X | X |
| 159 | GATA2    | O | X | X |
| 160 | GATA3    | O | X | X |
| 161 | GID4     | O | X | X |
| 162 | GNA11    | O | X | X |
| 163 | GNA13    | O | X | X |
| 164 | GNAQ     | O | X | X |
| 165 | GNAS     | O | X | X |
| 166 | GPR124   | O | X | X |
| 167 | GRIN2A   | O | X | X |
| 168 | GSK3B    | O | X | X |
| 169 | GUCY1A2  | O | X | X |
| 170 | H3F3A    | O | X | X |
| 171 | HGF      | O | X | X |
| 172 | HIST1H3B | O | X | X |
| 173 | HLA-A    | O | X | X |
| 174 | HNF1A    | O | X | X |
| 175 | HOXA3    | O | X | X |
| 176 | HRAS     | O | X | X |
| 177 | HSP90AA1 | O | X | X |
| 178 | IDH1     | O | X | X |
| 179 | IDH2     | O | X | X |
| 180 | IGF1     | O | X | X |
| 181 | IGF1R    | O | X | X |
| 182 | IGF2R    | O | X | X |
| 183 | IKBKE    | O | X | X |
| 184 | IKZF1    | O | X | X |
| 185 | IL7R     | O | X | X |
| 186 | INHBA    | O | X | X |
| 187 | INPP4B   | O | X | X |
| 188 | INSR     | O | X | X |
| 189 | IRF4     | O | X | X |
| 190 | IRS2     | O | X | X |
| 191 | ITK      | O | X | X |
| 192 | JAK1     | O | X | X |
| 193 | JAK2     | O | X | X |

|     |         |   |   |   |
|-----|---------|---|---|---|
| 194 | JAK3    | O | X | X |
| 195 | JUN     | O | X | X |
| 196 | KAT6A   | O | X | X |
| 197 | KDM5A   | O | X | X |
| 198 | KDM5C   | O | X | X |
| 199 | KDM6A   | O | X | X |
| 200 | KDR     | O | X | X |
| 201 | KEAP1   | O | X | X |
| 202 | KIT     | O | X | X |
| 203 | KLF4    | O | X | X |
| 204 | KLHL6   | O | X | X |
| 205 | KMT2A   | O | O | X |
| 206 | KRAS    | O | X | X |
| 207 | LMO1    | O | X | X |
| 208 | LRP1B   | O | X | X |
| 209 | LRP6    | O | X | X |
| 210 | LTK     | O | X | X |
| 211 | MAML1   | O | X | X |
| 212 | MAP2K1  | O | X | X |
| 213 | MAP2K2  | O | X | X |
| 214 | MAP2K4  | O | X | X |
| 215 | MAP3K1  | O | X | X |
| 216 | MAP3K13 | O | X | X |
| 217 | MCL1    | O | X | X |
| 218 | MDM2    | O | X | X |
| 219 | MDM4    | O | X | X |
| 220 | MED12   | O | X | X |
| 221 | MEF2B   | O | X | X |
| 222 | MEN1    | O | X | X |
| 223 | MET     | O | X | X |
| 224 | MITF    | O | X | X |
| 225 | MLH1    | O | X | X |
| 226 | MLL     | O | X | X |
| 227 | MLL2    | O | X | X |
| 228 | MLL3    | O | X | X |
| 229 | MPL     | O | X | X |
| 230 | MRE11A  | O | X | X |
| 231 | MSH2    | O | X | X |
| 232 | MSH6    | O | X | X |
| 233 | MTOR    | O | X | X |
| 234 | MUTYH   | O | X | X |
| 235 | MYC     | O | O | X |
| 236 | MYCL1   | O | X | X |
| 237 | MYCN    | O | X | X |
| 238 | MYD88   | O | X | X |
| 239 | NCOA3   | O | X | X |
| 240 | NCOR1   | O | X | X |
| 241 | NF1     | O | X | X |
| 242 | NF2     | O | X | X |

|     |         |   |   |   |
|-----|---------|---|---|---|
| 243 | NFE2L2  | O | X | X |
| 244 | NFKBIA  | O | X | X |
| 245 | NKX2-1  | O | X | X |
| 246 | NKX3-1  | O | X | X |
| 247 | NOTCH1  | O | X | X |
| 248 | NOTCH2  | O | X | X |
| 249 | NOTCH3  | O | X | X |
| 250 | NOTCH4  | O | X | X |
| 251 | NPM1    | O | X | X |
| 252 | NRAS    | O | X | X |
| 253 | NSD1    | O | X | X |
| 254 | NTRK1   | O | O | X |
| 255 | NTRK2   | O | X | X |
| 256 | NTRK3   | O | X | X |
| 257 | NUP93   | O | X | X |
| 258 | PAK3    | O | X | X |
| 259 | PAK7    | O | X | X |
| 260 | PALB2   | O | X | X |
| 261 | PARP1   | O | X | X |
| 262 | PARP2   | O | X | X |
| 263 | PARP3   | O | X | X |
| 264 | PARP4   | O | X | X |
| 265 | PAX5    | O | X | X |
| 266 | PBRM1   | O | X | X |
| 267 | PDGFRA  | O | O | X |
| 268 | PDGFRB  | O | X | X |
| 269 | PDK1    | O | X | X |
| 270 | PGR     | O | X | X |
| 271 | PHF6    | O | X | X |
| 272 | PHLPP2  | O | X | X |
| 273 | PIK3C3  | O | X | X |
| 274 | PIK3CA  | O | X | X |
| 275 | PIK3CG  | O | X | X |
| 276 | PIK3R1  | O | X | X |
| 277 | PIK3R2  | O | X | X |
| 278 | PKHD1   | O | X | X |
| 279 | PLCG1   | O | X | X |
| 280 | PMS2    | O | X | X |
| 281 | PNRC1   | O | X | X |
| 282 | PPP2R1A | O | X | X |
| 283 | PRDM1   | O | X | X |
| 284 | PRKAR1A | O | X | X |
| 285 | PRKDC   | O | X | X |
| 286 | PRPF40B | O | X | X |
| 287 | PRSS8   | O | X | X |
| 288 | PTCH1   | O | X | X |
| 289 | PTCH2   | O | X | X |
| 290 | PTEN    | O | X | X |
| 291 | PTPN11  | O | X | X |

|     |         |   |   |   |
|-----|---------|---|---|---|
| 292 | PTPRD   | O | X | X |
| 293 | RAB35   | O | X | X |
| 294 | RAC1    | O | X | X |
| 295 | RAC2    | O | X | X |
| 296 | RAD50   | O | X | X |
| 297 | RAD51   | O | X | X |
| 298 | RAD51B  | O | X | X |
| 299 | RAD51C  | O | X | X |
| 300 | RAD51D  | O | X | X |
| 301 | RAD52   | O | X | X |
| 302 | RAD54L  | O | X | X |
| 303 | RAF1    | O | O | X |
| 304 | RARA    | O | O | X |
| 305 | RB1     | O | X | X |
| 306 | REL     | O | X | X |
| 307 | RET     | O | O | X |
| 308 | RICTOR  | O | X | X |
| 309 | RNF43   | O | X | X |
| 310 | ROBO1   | O | X | X |
| 311 | ROBO2   | O | X | X |
| 312 | ROS1    | O | O | X |
| 313 | RPA1    | O | X | X |
| 314 | RPTOR   | O | X | X |
| 315 | RUNX1   | O | X | X |
| 316 | RUNX1T1 | O | X | X |
| 317 | SEMA3A  | O | X | X |
| 318 | SEMA3E  | O | X | X |
| 319 | SETBP1  | O | X | X |
| 320 | SETD2   | O | X | X |
| 321 | SF3A1   | O | X | X |
| 322 | SF3B1   | O | X | X |
| 323 | SFRS7   | O | X | X |
| 324 | SH2B3   | O | X | X |
| 325 | SKP2    | O | X | X |
| 326 | SLIT2   | O | X | X |
| 327 | SMAD2   | O | X | X |
| 328 | SMAD3   | O | X | X |
| 329 | SMAD4   | O | X | X |
| 330 | SMARCA1 | O | X | X |
| 331 | SMARCA4 | O | X | X |
| 332 | SMARCB1 | O | X | X |
| 333 | SMARCD1 | O | X | X |
| 334 | SMO     | O | X | X |
| 335 | SOCS1   | O | X | X |
| 336 | SOX10   | O | X | X |
| 337 | SOX2    | O | X | X |
| 338 | SOX9    | O | X | X |
| 339 | SPEN    | O | X | X |
| 340 | SPOP    | O | X | X |

|     |          |   |   |   |
|-----|----------|---|---|---|
| 341 | SRC      | O | X | X |
| 342 | SRSF1    | O | X | X |
| 343 | SRSF2    | O | X | X |
| 344 | STAG2    | O | X | X |
| 345 | STAT3    | O | X | X |
| 346 | STAT4    | O | X | X |
| 347 | STK11    | O | X | X |
| 348 | SUFU     | O | X | X |
| 349 | SYK      | O | X | X |
| 350 | TBX22    | O | X | X |
| 351 | TBX3     | O | X | X |
| 352 | TET2     | O | X | X |
| 353 | TERT     | X | X | O |
| 354 | TGFBR2   | O | X | X |
| 355 | TIPARP   | O | X | X |
| 356 | TMPRSS2  | O | O | X |
| 357 | TNFAIP3  | O | X | X |
| 358 | TNFRSF14 | O | X | X |
| 359 | TNKS     | O | X | X |
| 360 | TNKS2    | O | X | X |
| 361 | TOP1     | O | X | X |
| 362 | TP53     | O | X | X |
| 363 | TRAF7    | O | X | X |
| 364 | TRRAP    | O | X | X |
| 365 | TSC1     | O | X | X |
| 366 | TSC2     | O | X | X |
| 367 | TSHR     | O | X | X |
| 368 | U2AF1    | O | X | X |
| 369 | U2AF2    | O | X | X |
| 370 | USP9X    | O | X | X |
| 371 | VHL      | O | X | X |
| 372 | WHSC1L1  | O | X | X |
| 373 | WISP3    | O | X | X |
| 374 | WT1      | O | X | X |
| 375 | WWP1     | O | X | X |
| 376 | XBP1     | O | X | X |
| 377 | XPO1     | O | X | X |
| 378 | XRCC3    | O | X | X |
| 379 | ZNF217   | O | X | X |
| 380 | ZNF703   | O | X | X |
| 381 | ZRSR2    | O | X | X |

---
